# Supplementary material for: A rhombus channel metal–organic framework comprised of Sr2+ and thiophene-2, 5-dicarboxylic acid exhibiting novel dielectric bistability
Source: Royal Society of Chemistry journal article supplement (doi:10.1039/c2ce26450a), 2012-11-28
Supplement: c2ce26450a.pdf [file c2ce26450a.pdf]

# **A rhombus channel metal-organic framework comprised of Sr<sup>2+</sup> and thiophene-2, 5-dicarboxylic acid exhibiting novel dielectric bistability**

Qian Chen,<sup>a</sup> Ping-Chun Guo,<sup>a</sup> Shun-Ping Zhao,<sup>a</sup> Jian-Lan Liu,<sup>a</sup> Xiao-Ming Ren\*<sup>a, b</sup>

<sup>a</sup> State Key Laboratory of Materials-Oriented Chemical Engineering and College of Science, Nanjing University of Technology, Nanjing 210009, P. R. China

<sup>b</sup> State Key Laboratory & Coordination Chemistry Institute, School of Chemistry and Chemical Engineering, Nanjing University, Nanjing 210093, P. R. China

Tel.: +86-25-83587820

Fax: +86-25-83587420

E-mail: [xmren@njut.edu.cn](mailto:xmren@njut.edu.cn) (Ren)

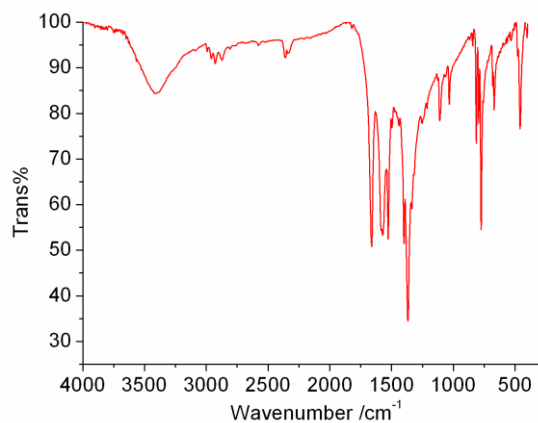

Figure S1 IR spectrum of MOF 1.

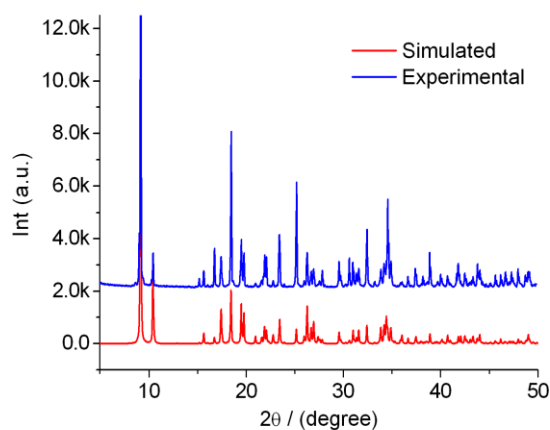

Figure S2 Experimental and simulated PXRD patterns of MOF 1.

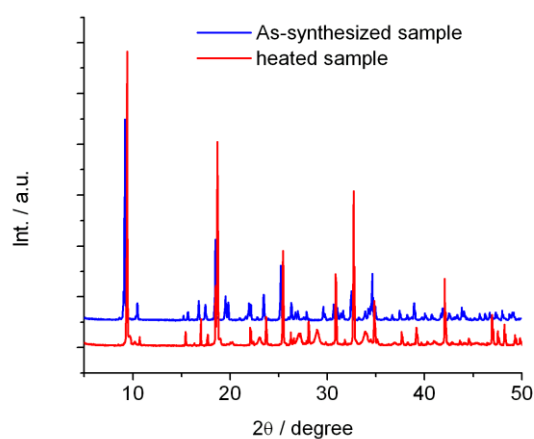

Figure S3 PXRD patterns of MOF 1 (Blue line: as-synthesized sample; red line: heated up to 260 °C and cooling down).

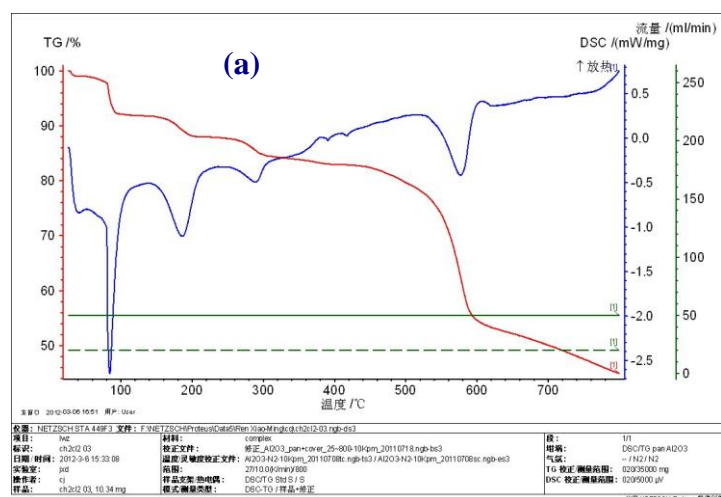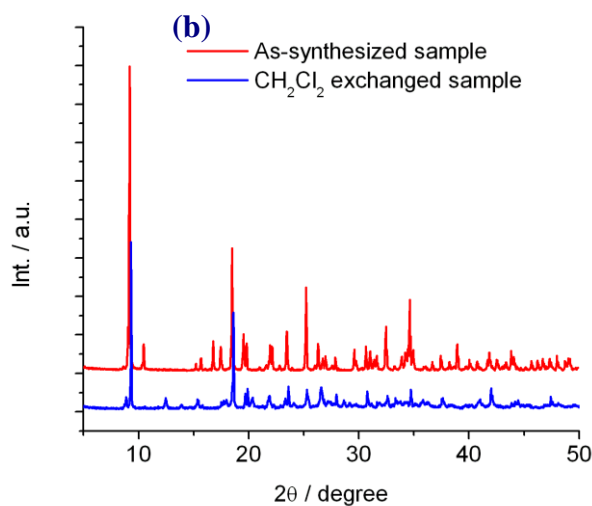

Figure S4  $\text{CH}_2\text{Cl}_2$  exchanged sample of MOF **1** (a) TG plot and (b) PXRD profiles for as-synthesized and  $\text{CH}_2\text{Cl}_2$  exchanged samples.

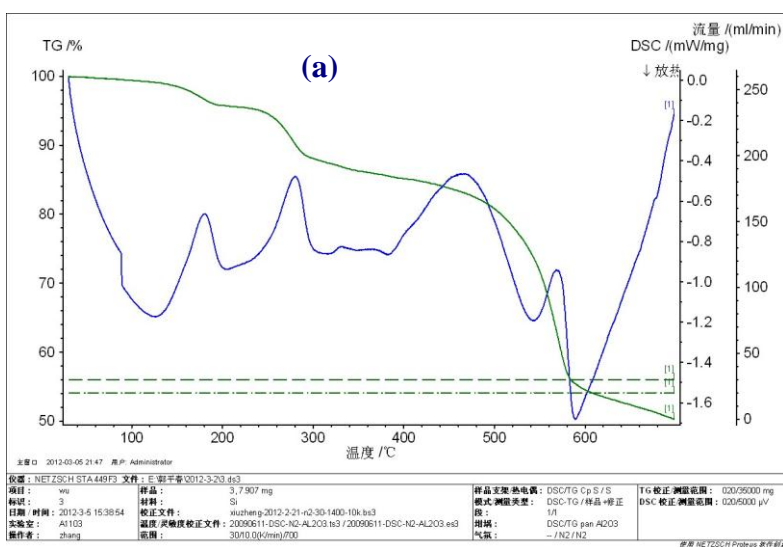

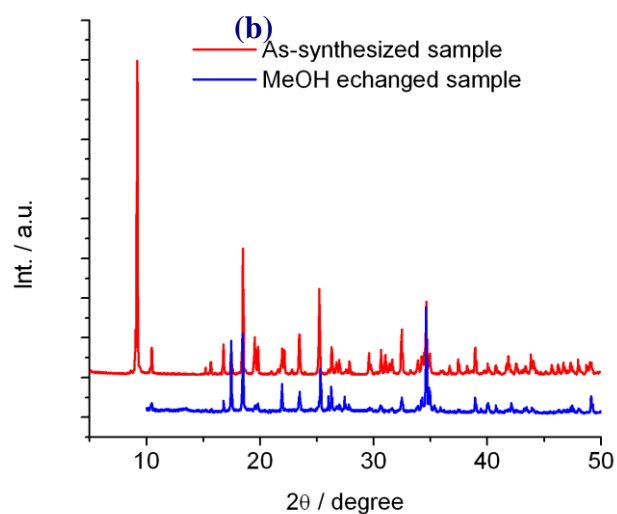

Figure 5 MeOH exchanged sample of MOF 1 (a) TG plot and (b) PXRD profiles for as-synthesized and MeOH exchanged samples.

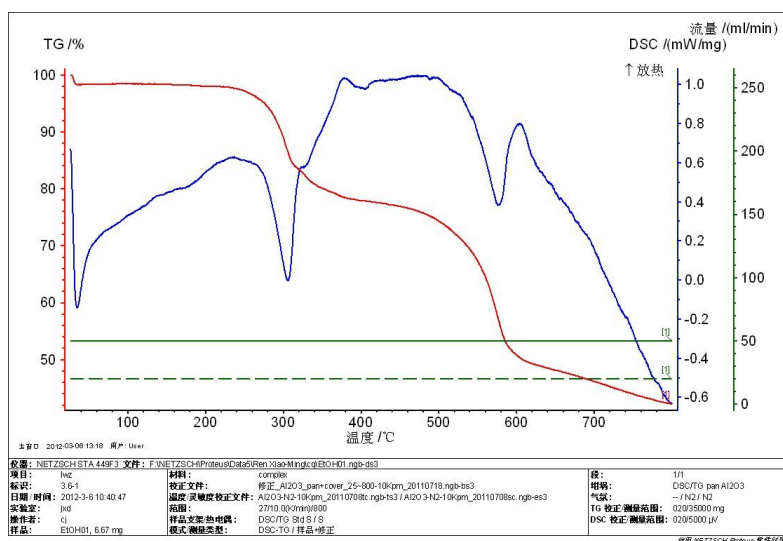

Figure S6 TG plot for the sample of MOF 1 using MeOH exchange.

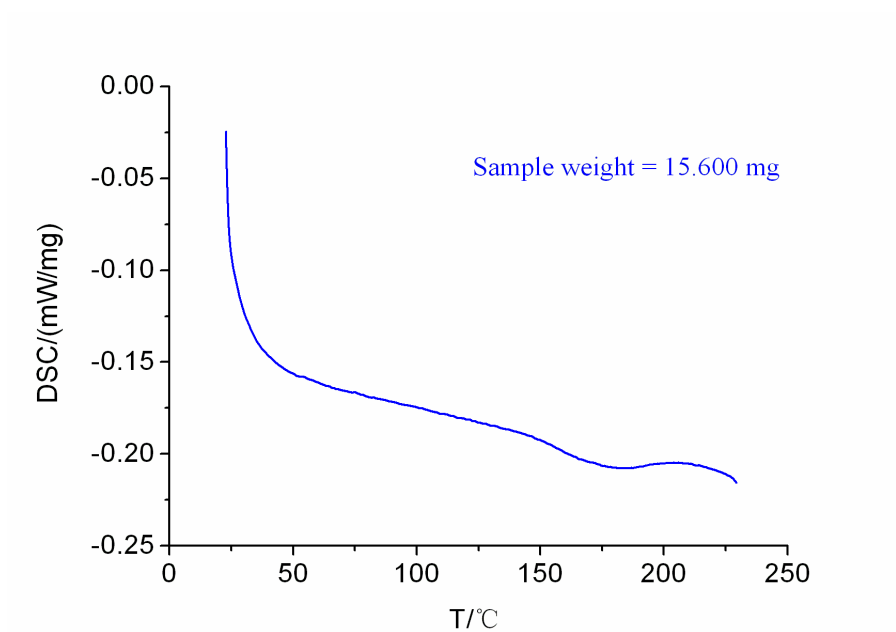

Figure S7 DSC curve of **1** in the region from 20 to 230°C.

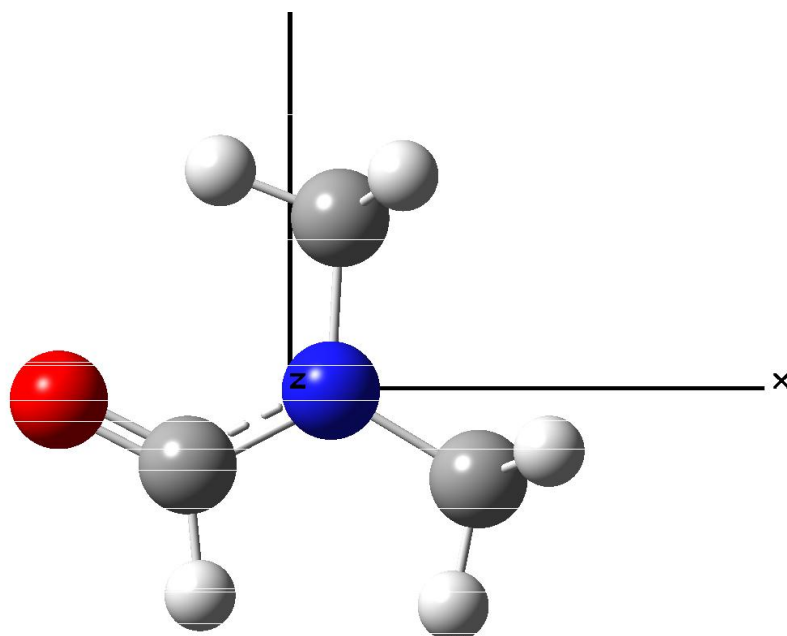

Figure S8 Optimized molecule structure of DMF and the Cartesian axes with dipole moments of X = 4.2073, Y = -0.4061, Z = 0.0001 and Tot = 4.2268 Debye.

New x-ray single crystal data

**Table S1** Crystal data and structure refinements at 298 and 123 K for **1**

|                                            |                                                   |                           |
|--------------------------------------------|---------------------------------------------------|---------------------------|
| Chemical formula                           | C <sub>9</sub> H <sub>9</sub> NO <sub>5</sub> SSr |                           |
| Formula weight                             | 330.85                                            |                           |
| Temperature (K)                            | 298(2)                                            | 123(2)                    |
| Wavelength(Å)                              | 0.71073                                           |                           |
| Crystal system                             | Monoclinic                                        |                           |
| Space group                                | P 2 <sub>1</sub> /n                               |                           |
| a (Å)                                      | 6.0028(12)                                        | 5.9896(5)                 |
| b (Å)                                      | 16.916(3)                                         | 17.0674(16)               |
| c (Å)                                      | 11.649(2)                                         | 11.3975(10)               |
| α (°)                                      | 90.00                                             | 90.00                     |
| β (°)                                      | 91.350(3)                                         | 91.2390(10)               |
| γ (°)                                      | 90.00                                             | 90.00                     |
| V (Å <sup>3</sup> ) / Z                    | 1182.5(4)/ 4                                      | 1164.86(18)/ 4            |
| Density(g/cm <sup>3</sup> )                | 1.858                                             | 1.887                     |
| Absorption coefficient (mm <sup>-1</sup> ) | 4.744                                             | 4.815                     |
| F(000)                                     | 656                                               | 656                       |
| Data collection θ range                    | 2.12-27.56                                        | 2.15-27.55                |
| Index range                                | -7 ≤ h ≤ 5                                        | -5 ≤ h ≤ 7                |
|                                            | -22 ≤ k ≤ 22                                      | -22 ≤ k ≤ 22              |
|                                            | -15 ≤ l ≤ 15                                      | -14 ≤ l ≤ 14              |
| Reflections collected                      | 10549                                             | 10394                     |
| Independent reflections                    | 2722                                              | 2686                      |
| R(int)                                     | 0.0494                                            | 0.0372                    |
| Absorption correction                      | Semi-empirical from equivalents                   |                           |
| Refinement method on F <sup>2</sup>        | Full-matrix least-squares                         |                           |
| Data/restraints/parameters                 | 2722/0/182                                        | 2686/0/154                |
| Goodness-of-fit on F <sup>2</sup>          | 1.066                                             | 1.144                     |
| Final R indices [I > 2σ(I)]                | R1 = 0.0297, wR2 = 0.0822                         | R1 = 0.0327, wR2 = 0.0989 |
| R indices (all data)                       | R1 = 0.0431, wR2 = 0.0885                         | R1 = 0.0398, wR2 = 0.1039 |

$$R_1 = \Sigma(|F_0| - |F_c|) / \Sigma|F_0|, \quad wR_2 = \Sigma w(|F_0|^2 - |F_c|^2)^2 / \Sigma w(|F_0|^2)^2)^{1/2}$$

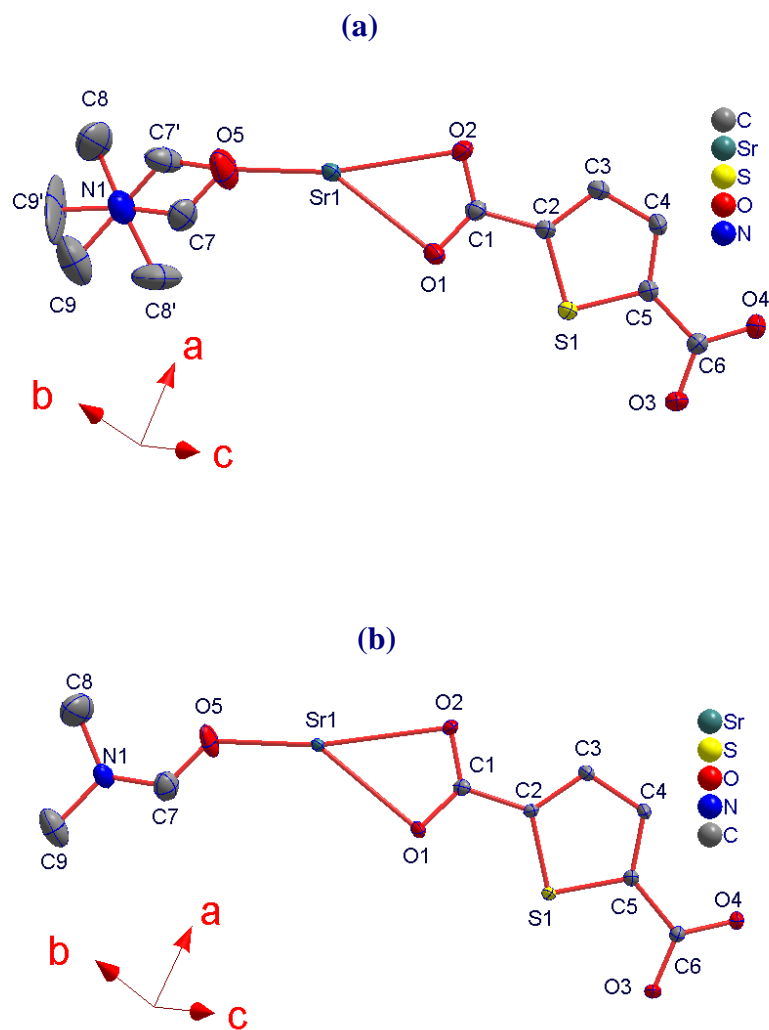

**Figure S9** Asymmetric unit with thermal ellipsoids at 50% probability level (a) at 298 K and (b) 123 K, which show the disordered DMF molecule at 298 K froze at 123 K.
